# Supplementary material for: The effects of psychosocial interventions on the mental health, pregnancy rates, and marital function of infertile couples undergoing in vitro fertilization: a systematic review
Source: Springer Nature journal article supplement (doi:10.1007/s10815-016-0690-8), 2016-03-16
Supplement: MOESM2 [file 8901446]

**Table S2 Methodological Quality Assessment of the Included Studies**

| **Study (Sorted by Intervention Category)** | **1. Was the method of randomization adequate?** | **2.Was the treatment allocation concealed** | **3. Was the patient blinded to the intervention?** | **4. Was the care provider blinded to the intervention?** | **5. Was the outcome assessor blinded to the intervention?** | **6. Was the drop-out rate described and acceptable?** | **7. Were all randomized participants analyzed in the group to which they were allocated?** | **8. Are reports of the study free of suggestion of selective outcome reporting?** | **9. Were the groups similar at baseline regarding the most important prognostic indicators?** | **10. Were co-interventions avoided or similar?** | **11. Was the compliance acceptable in all groups?** | **12. Was the timing of the outcome assessment similar in all groups?** |
| --- | --- | --- | --- | --- | --- | --- | --- | --- | --- | --- | --- | --- |
| 1 Gorayeb et al. 2012 | Yes | Unsure | No | No | Yes | No | No | Yes | Yes | Yes | No | Yes |
| 2 Mosalanejad et al. 2012a,b | Unsure | Unsure | No | No | No | Yes | Yes | Yes | Yes | Yes | Yes | Yes |
| 3 Tarabusi et al. 2004 | Unsure | Unsure | No | No | No | Yes | No | Yes | Yes | Yes | Yes | Yes |
| 4 Chan et al. 2006 | Yes | Unsure | No | No | No | Yes | No | Yes | Yes | Yes | Yes | Yes |
| 5 Chan et al.2012 | Yes | No | No | No | No | Yes | No | Yes | Yes | Yes | Yes | Yes |
| 6 Domar et al.2011 | Yes | Yes | No | No | Yes | No | No | Yes | Yes | Yes | No | Yes |
| 7 Connolly et al.1993 | Unsure | Unsure | No | No | No | No | No | Yes | Yes | Yes | Yes | Yes |
| 8 de Klerk et al.2005 | Yes | Yes | No | No | No | No | No | Yes | Yes | Yes | No | Yes |
| 9 Emery et al.2003 | Yes | Yes | No | No | No | Yes | No | Yes | Yes | Yes | Yes | Yes |
| 10 Zyl et al.2005 | Unsure | Yes | No | No | No | Yes | No | Yes | Yes | Yes | Yes | Yes |
| 11Catoire et al.2013 | Yes | Yes | Yes | No | Yes | Yes | No | Yes | Yes | Yes | Yes | Yes |
| 12 Lancastle et al. 2008 | Unsure | Yes | Yes | Yes | Yes | No | No | Yes | Yes | Yes | No | Yes |
| 13 Ockhuijsen et al.2014 | Yes | Yes | Yes | Yes | Yes | Yes | Yes | Yes | Yes | Yes | Yes | Yes |
| 14 Tuil et al. 2007 | No | Yes | No | Yes | No | No | No | Yes | Yes | Unsure | Yes | Yes |
| 15 Lee et al. 2003 | Unsure | Unsure | No | No | No | Yes | Yes | Yes | Yes | Yes | Yes | Yes |
| 16 Matthiesen et al. 2012 | Yes | No | Yes | No | Yes | Yes | No | Yes | Yes | Yes | No | Yes |
| 17 Murphy et al. 2014 | Yes | Unsure | No | No | No | Yes | No | Yes | Yes | Yes | Yes | Yes |
| 18 Panagopoulou et al.2009 | Unsure | Unsure | Yes | Yes | Yes | Yes | Yes | Yes | Yes | Yes | Yes | Yes |
| 19 [Skiadas](http://www.refworks.com/refworks2/default.aspx?r=references|MainLayout::init) et al.2011 | Yes | Yes | No | No | No | No | Yes | Yes | Yes | Yes | No | Yes |
| 20 Zhu et al.2010 | Yes | Unsure | No | No | No | Yes | No | Yes | Yes | Yes | Yes | Yes |
